# Supplementary material
Source: PubMed Central journal article supplement (PMC8653968)
Supplement: NIHMS1757673-supplement-Supplemental_Material.pdf [file NIHMS1757673-supplement-Supplemental_Material.pdf]

## Supplementary Tables

**Supplemental Table 1. Ancestry categories for non-Hispanic White individuals in the ACS.**

| <b>Western European</b>   | <b>Eastern European</b> | <b>European, nec</b>             | <b>North American</b>        |
|---------------------------|-------------------------|----------------------------------|------------------------------|
| Alsatian, Alsace-Lorraine | Albanian                | Central European, nec            | Afro-American                |
| Austrian                  | Belorussian             | Northern European, nec           | African-American             |
| Basque                    | Bulgarian               | Southern European, nec           | Central American Indian      |
| Belgian                   | Cossack                 | European, nec                    | South American Indian        |
| Flemish                   | Croatian                |                                  | American Indian (all tribes) |
| British                   | Czechoslovakian         |                                  | Aleut                        |
| British Isles             | Bohemian                |                                  | Eskimo                       |
| Danish                    | Estonian                | <b>Middle East, North Africa</b> | White/Caucasian              |
| Dutch                     | Georgian                | Algerian                         | Canadian                     |
| English                   | Germans from Russia     | Egyptian                         | French Canadian              |
| Finnish                   | Rom                     | Moroccan                         | Acadian                      |
| French                    | Hungarian               | North African                    | United States                |
| German                    | Latvian                 | Iranian                          | Texas                        |
| Prussian                  | Lithuanian              | Iraqi                            | North American               |
| Greek                     | Macedonian              | Israeli                          |                              |
| Icelandic                 | Polish                  | Jordanian                        |                              |
| Irish, various subheads   | Romanian                | Lebanese                         |                              |
| Italian                   | Moldavian               | Saudi Arabian                    | <b>Residual</b>              |
| Sicilian                  | Russian                 | Syrian                           | Mixture                      |
| Luxemburger               | Serbian                 | Armenian                         | Uncodable                    |
| Maltese                   | Slovak                  | Turkish                          | Other                        |
| Norwegian                 | Slovene                 | Yemeni                           | Not Reported                 |
| Portuguese                | Uzbek                   | Kurdish                          | Other NHW individuals        |
| Scotch Irish              | Ukrainian               | Palestinian                      |                              |
| Scottish                  | Yugoslavian             | Assyrian/Chaldean/Syriac         |                              |
| Swedish                   | Slav                    | Middle Eastern                   |                              |
| Swiss                     | Slavonian               | Arab                             |                              |
| Romansch                  | Eastern European, nec   | Other Arab                       |                              |
| Welsh                     |                         |                                  |                              |
| Scandinavian, Nordic      |                         |                                  |                              |
| Western European, nec     |                         |                                  |                              |

nec=not elsewhere classified

**Supplementary Table 2. Results of logistic regression models for six health outcomes in the ACS (n = 14,148,964).**

|                       | PHYSICAL DISABILITY |                  |                     | SELF-CARE DISABILITY |                  |                     |
|-----------------------|---------------------|------------------|---------------------|----------------------|------------------|---------------------|
|                       | Model 1             | Model 2          | Model 3             | Model 1              | Model 2          | Model 3             |
| NH White (ref)        |                     |                  |                     |                      |                  |                     |
| NH Black              | 0.37 (0.003)***     | 0.63 (0.003)***  | 0.20 (0.003)***     | 0.33 (0.004)***      | 0.61 (0.005)***  | 0.14 (0.01)***      |
| NH Asian              | -0.64 (0.01)***     | -0.47 (0.01)***  | -0.14 (0.01)***     | -0.47 (0.01)***      | -0.25 (0.01)***  | -0.16 (0.01)***     |
| Hispanic              | -0.17 (0.004)***    | 0.16 (0.004)***  | -0.05 (0.005)***    | -0.12 (0.01)***      | 0.24 (0.01)***   | -0.11 (0.01)***     |
| Age                   | .                   | 0.003 (0.001)*** | 0.03 (0.001)***     | .                    | -0.08 (0.001)*** | -0.06 (0.001)***    |
| Age squared           | .                   | 0.000 (0.000)*** | 0.0002 (0.00001)*** | .                    | 0.001 (0.000)*** | 0.001 (0.00001)***  |
| Sex                   | .                   | 0.24 (0.002)***  | 0.11 (0.002)***     | .                    | 0.18 (0.003)***  | 0.03 (0.003)***     |
| Married (ref)         |                     |                  |                     |                      |                  |                     |
| Separated/Divorced    | .                   | .                | 0.37 (0.003)***     | .                    | .                | 0.30 (0.005)***     |
| Widowed               | .                   | .                | 0.30 (0.003)***     | .                    | .                | 0.26 (0.005)***     |
| Never married/single  | .                   | .                | 0.38 (0.004)***     | .                    | .                | 0.62 (0.01)***      |
| No health insurance   | .                   | .                | -0.62 (0.005)***    | .                    | .                | -0.98 (0.01)***     |
| Poverty               | .                   | .                | -0.003 (0.00001)*** | .                    | .                | -0.004 (0.00001)*** |
| <HS (ref)             |                     |                  |                     |                      |                  |                     |
| HS graduate           | .                   | .                | -0.38 (0.003)***    | .                    | .                | -0.30 (0.004)***    |
| Some college          | .                   | .                | -0.44 (0.003)***    | .                    | .                | -0.40 (0.005)***    |
| College degree+       | .                   | .                | -0.89 (0.004)***    | .                    | .                | -0.66 (0.01)***     |
| Poor English          | .                   | .                | 0.25 (0.01)***      | .                    | .                | 0.44 (0.01)***      |
| Not a citizen         | .                   | .                | -0.39 (0.01)***     | .                    | .                | -0.42 (0.01)***     |
| Foreign-born          | .                   | .                | -0.42 (0.005)***    | .                    | .                | -0.22 (0.01)***     |
| Live in South         | .                   | .                | 0.15 (0.002)***     | .                    | .                | 0.09 (0.003)***     |
| Year                  | .                   | .                | -0.005 (0.0004)***  | .                    | .                | -0.01 (0.001)***    |
| Constant              | -1.87 (0.001)***    | -4.35 (0.02)***  | -3.30 (0.02)***     | -2.92 (0.002)***     | -2.82 (0.03)***  | -1.38 (0.03)***     |
| Pseudo R <sup>2</sup> | 0.01                | 0.1117           | 0.18                | 0.003                | 0.1209           | 0.19                |
| BIC                   | 1.01E+09            | 9.02E+08         | 8.34E+08            | 5.23E+08             | 4.61E+08         | 4.25E+08            |

Supplementary Table 2 *continued.*

|                       | INDEPENDENT LIVING DISABILITY |                   |                     | HEARING DISABILITY |                  |                     |
|-----------------------|-------------------------------|-------------------|---------------------|--------------------|------------------|---------------------|
|                       | Model 1                       | Model 2           | Model 3             | Model 1            | Model 2          | Model 3             |
| NH White (ref)        |                               |                   |                     |                    |                  |                     |
| NH Black              | -0.58 (0.01)***               | 0.59 (0.004)***   | -0.54 (0.01)***     | -0.58 (0.01)***    | -0.33 (0.01)***  | -0.54 (0.01)***     |
| NH Asian              | -0.72 (0.01)***               | -0.09 (0.01)***   | -0.15 (0.01)***     | -0.72 (0.01)***    | -0.50 (0.01)***  | -0.15 (0.01)***     |
| Hispanic              | -0.49 (0.01)***               | 0.18 (0.005)***   | -0.15 (0.01)***     | -0.49 (0.01)***    | -0.115 (0.01)*** | -0.15 (0.01)***     |
| Age                   | .                             | -0.124 (0.001)*** | 0.02 (0.001)***     | .                  | 0.02 (0.001)***  | 0.02 (0.001)***     |
| Age squared           | .                             | 0.001 (0.000)***  | 0.0003 (0.00001)*** | .                  | 0.000 (0.000)*** | 0.0003 (0.00001)*** |
| Sex                   | .                             | 0.31 (0.003)***   | -0.77 (0.003)***    | .                  | -0.68 (0.003)*** | -0.77 (0.003)***    |
| Married (ref)         |                               |                   |                     |                    |                  |                     |
| Separated/Divorced    | .                             | .                 | 0.13 (0.004)***     | .                  | .                | 0.13 (0.004)***     |
| Widowed               | .                             | .                 | 0.14 (0.004)***     | .                  | .                | 0.14 (0.004)***     |
| Never married/single  | .                             | .                 | 0.05 (0.01)***      | .                  | .                | 0.05 (0.01)***      |
| No health insurance   | .                             | .                 | -0.17 (0.01)***     | .                  | .                | -0.17 (0.01)***     |
| Poverty               | .                             | .                 | -0.001 (0.00001)*** | .                  | .                | -0.001 (0.00001)*** |
| <HS (ref)             |                               |                   |                     |                    |                  |                     |
| HS graduate           | .                             | .                 | -0.27 (0.004)***    | .                  | .                | -0.27 (0.004)***    |
| Some college          | .                             | .                 | -0.28 (0.004)***    | .                  | .                | -0.28 (0.004)***    |
| College degree+       | .                             | .                 | -0.64 (0.005)***    | .                  | .                | -0.64 (0.005)***    |
| Poor English          | .                             | .                 | 0.18 (0.01)***      | .                  | .                | 0.18 (0.01)***      |
| Not a citizen         | .                             | .                 | -0.19 (0.01)***     | .                  | .                | -0.19 (0.01)***     |
| Foreign-born          | .                             | .                 | -0.46 (0.01)***     | .                  | .                | -0.46 (0.01)***     |
| Live in South         | .                             | .                 | 0.13 (0.003)***     | .                  | .                | 0.13 (0.003)***     |
| Year                  | .                             | .                 | -0.002 (0.001)***   | .                  | .                | -0.002 (0.001)***   |
| Constant              | -2.49 (0.001)***              | -1.15 (0.03)***   | -3.89 (0.03)***     | -2.49 (0.001)***   | -4.54 (0.03)***  | -3.89 (0.03)***     |
| Pseudo R <sup>2</sup> | 0.01                          | 0.1381            | 0.16                | 0.01               | 0.15             | 0.16                |
| BIC                   | 6.36E+08                      | 6.63E+08          | 5.36E+08            | 6.36E+08           | 5.44E+08         | 5.36E+08            |

Supplementary Table 2 *continued.*

|                       | VISION DISABILITY |                  |                     | COGNITIVE DISABILITY |                      |                     |
|-----------------------|-------------------|------------------|---------------------|----------------------|----------------------|---------------------|
|                       | Model 1           | Model 2          | Model 3             | Model 1              | Model 2              | Model 3             |
| NH White (ref)        |                   |                  |                     |                      |                      |                     |
| NH Black              | 0.46 (0.005)***   | 0.66 (0.01)***   | 0.25 (0.01)***      | 0.36 (0.004)***      | 0.51 (0.004)***      | -0.07 (0.004)***    |
| NH Asian              | -0.43 (0.01)***   | -0.25 (0.01)***  | -0.07 (0.01)***     | -0.43 (0.01)***      | -0.30 (0.01)***      | -0.03 (0.01)**      |
| Hispanic              | 0.21 (0.01)***    | 0.49 (0.019)***  | 0.16 (0.01)***      | -0.08 (0.005)***     | 0.12 (0.005)***      | -0.21 (0.01)***     |
| Age                   | .                 | -0.04 (0.001)*** | -0.02 (0.001)***    | .                    | -0.12 (0.001)***     | -0.09 (0.001)***    |
| Age squared           | .                 | 0.001 (0.000)*** | 0.0004 (0.00001)*** | .                    | 0.0012578 (0.000)*** | 0.001 (0.00001)***  |
| Sex                   | .                 | 0.02 (0.004)***  | -0.10 (0.004)***    | .                    | 0.03 (0.003)***      | -0.10 (0.003)***    |
| Married (ref)         |                   |                  |                     |                      |                      |                     |
| Separated/Divorced    | .                 | .                | 0.34 (0.01)***      | .                    | .                    | 0.51 (0.004)***     |
| Widowed               | .                 | .                | 0.31 (0.01)***      | .                    | .                    | 0.36 (0.005)***     |
| Never married/single  | .                 | .                | 0.38 (0.01)***      | .                    | .                    | 0.91 (0.004)***     |
| No health insurance   | .                 | .                | -0.16 (0.01)***     | .                    | .                    | -0.74 (0.01)***     |
| Poverty               | .                 | .                | -0.003 (0.00001)*** | .                    | .                    | -0.004 (0.00001)*** |
| <HS (ref)             |                   |                  |                     |                      |                      |                     |
| HS graduate           | .                 | .                | -0.40 (0.005)***    | .                    | .                    | -0.49 (0.004)***    |
| Some college          | .                 | .                | -0.46 (0.01)***     | .                    | .                    | -0.64 (0.004)***    |
| College degree+       | .                 | .                | -0.78 (0.01)***     | .                    | .                    | -1.02 (0.01)***     |
| Poor English          | .                 | .                | 0.30 (0.01)***      | .                    | .                    | 0.42 (0.01)***      |
| Not a citizen         | .                 | .                | -0.17 (0.01)***     | .                    | .                    | -0.59 (0.01)***     |
| Foreign-born          | .                 | .                | -0.30 (0.01)***     | .                    | .                    | -0.37 (0.01)***     |
| Live in South         | .                 | .                | 0.20 (0.004)***     | .                    | .                    | 0.10 (0.003)***     |
| Year                  | .                 | .                | 0.002 (0.001)***    | .                    | .                    | -0.004 (0.001)***   |
| Constant              | -3.26 (0.002)***  | -3.60 (0.04)***  | -2.97 (0.04)***     | -2.63 (0.002)***     | -0.16 (0.03)***      | 0.86 (0.03)***      |
| Pseudo R <sup>2</sup> | 0.004             | 0.07             | 0.11                | 0.003                | 0.06                 | 0.15                |
| BIC                   | 4.29E+08          | 4.01E+08         | 3.83E+08            | 6.41E+08             | 6.07E+08             | 5.46E+08            |

**Note:** Sample sizes are unweighted. Estimates are weighted. NH=non-Hispanic. sd=standard deviation. Poverty=percent of poverty threshold.

\*p<0.05; \*\*p<0.01; \*\*\*p<0.001.

**Supplementary Table 3.**

**Logistic regression coefficients and standard errors for physical disability (ACS, n = 14,148,964).**

| <b>Group (reference)</b> | <b>Variable</b>       | <b>Model 1</b>   | <b>Model 2</b>   | <b>Model 3</b>    |
|--------------------------|-----------------------|------------------|------------------|-------------------|
| White (W European)       | E European            | -0.05 (0.01)***  | -0.09 (0.005)*** | -0.009 (0.005)    |
|                          | European, nec         | -0.44 (0.01)***  | -0.23 (0.01)***  | -0.04 (0.01)***   |
|                          | N American            | 0.28 (0.003)***  | 0.38 (0.003)***  | 0.14 (0.003)***   |
|                          | MENA                  | -0.03 (0.01)*    | 0.14 (0.01)***   | 0.28 (0.02)***    |
|                          | Other White           | 0.37 (0.003)***  | 0.37 (0.003)***  | 0.08 (0.003)***   |
| Black                    | N American            | 0.54 (0.003)***  | 0.82 (0.004)***  | 0.28 (0.004)***   |
|                          | African               | -0.07 (0.02)***  | 0.39 (0.02)***   | 0.15 (0.02)***    |
|                          | West Indian           | -0.25 (0.02)***  | -0.008 (0.02)    | -0.02 (0.02)      |
|                          | C/S American          | -0.37 (0.06)***  | -0.15 (0.06)*    | 0.03 (0.06)       |
|                          | European              | 0.66 (0.03)***   | 0.91 (0.03)***   | 0.47 (0.03)***    |
| Asian                    | Other Black           | 0.61 (0.008)***  | 0.80 (0.008)***  | 0.19 (0.01)***    |
|                          | Chinese               | -0.73 (0.01)***  | -0.62 (0.01)***  | -0.54 (0.01)***   |
|                          | Filipino              | -0.43 (0.01)***  | -0.27 (0.01)***  | 0.21 (0.01)***    |
|                          | Asian Indian          | -0.66 (0.02)***  | -0.31 (0.02)***  | 0.24 (0.02)***    |
|                          | Vietnamese            | -0.51 (0.02)***  | -0.21 (0.02)***  | -0.39 (0.02)***   |
| Hispanic                 | Korean                | -0.77 (0.02)***  | -0.59 (0.02)***  | -0.43 (0.02)***   |
|                          | Japanese              | -0.25 (0.02)***  | -0.51 (0.02)***  | -0.25 (0.02)***   |
|                          | Other Asian           | -0.32 (0.02)***  | 0.06 (0.02)***   | 0.05 (0.02)**     |
|                          | Mexican               | -0.11 (0.005)*** | 0.30 (0.005)***  | -0.04 (0.01)***   |
|                          | Puerto Rican          | 0.42 (0.009)***  | 0.75 (0.01)***   | 0.13 (0.01)***    |
| Covariate (reference)    | Cuban                 | 0.08 (0.01)***   | 0.07 (0.01)***   | -0.17 (0.02)***   |
|                          | Central American      | -0.51 (0.01)***  | -0.04 (0.01)**   | -0.21 (0.02)***   |
|                          | South American        | -0.64 (0.02)***  | -0.35 (0.02)***  | -0.29 (0.02)***   |
|                          | Other Hispanic        | 0.18 (0.01)***   | 0.42 (0.01)***   | 0.11 (0.01)***    |
|                          | Age                   | .                | 0.004 (0.001)*** | 0.03 (0.001)***   |
| Age squared              | .                     | 0.000 (0.000)*** | 0.000 (0.000)*** |                   |
| Sex                      | .                     | 0.23 (0.002)***  | 0.11 (0.002)***  |                   |
| Marital status (Married) | Separated/Divorced    | .                | .                | 0.37 (0.003)***   |
|                          | Widowed               | .                | .                | 0.30 (0.003)***   |
|                          | NM/single             | .                | .                | 0.38 (0.004)***   |
|                          | No health insurance   | .                | .                | -0.62 (0.005)***  |
|                          | Poverty               | .                | .                | -0.003 (0.000)*** |
| Education (<HS)          | HS graduate           | .                | .                | -0.37 (0.003)***  |
|                          | Some college          | .                | .                | -0.42 (0.003)***  |
|                          | College degree +      | .                | .                | -0.87 (0.004)***  |
|                          | Poor English          | .                | .                | 0.29 (0.01)***    |
|                          | Not a citizen         | .                | .                | -0.39 (0.01)***   |
| Other                    | Foreign-born          | .                | .                | -0.37 (0.01)***   |
|                          | Live in South         | .                | .                | 0.14 (0.002)***   |
|                          | Year                  | .                | .                | -0.005 (0.000)*** |
|                          | Constant              | -1.98 (0.002)*** | -4.53 (0.02)***  | -3.36 (0.02)***   |
|                          | Pseudo R <sup>2</sup> | 0.01             | 0.12             | 0.18              |

Supplementary Table 3 *continued*.

Logistic regression coefficients and standard errors for self-care disability (ACS, n = 14,148,964).

| Group (reference)        | Variable              | Model 1          | Model 2          | Model 3           |
|--------------------------|-----------------------|------------------|------------------|-------------------|
| White (W European)       | E European            | 0.09 (0.007)***  | 0.04 (0.01)***   | 0.06 (0.01)***    |
|                          | European, nec         | -0.23 (0.02)***  | 0.04 (0.02)*     | 0.21 (0.02)***    |
|                          | N American            | 0.33 (0.005)***  | 0.44 (0.01)***   | 0.23 (0.01)***    |
|                          | MENA                  | 0.47 (0.02)***   | 0.67 (0.02)***   | 0.63 (0.02)***    |
|                          | Other White           | 0.65 (0.004)***  | 0.63 (0.004)***  | 0.34 (0.01)***    |
| Black                    | N American            | 0.58 (0.005)***  | 0.87 (0.01)***   | 0.31 (0.01)***    |
|                          | African               | 0.05 (0.02)*     | 0.55 (0.02)***   | 0.19 (0.02)***    |
|                          | West Indian           | -0.13 (0.02)***  | 0.15 (0.024)***  | -0.02 (0.03)      |
|                          | C/S American          | -0.26 (0.10)**   | 0.02 (0.10)      | 0.03 (0.10)       |
|                          | European              | 0.65 (0.04)***   | 0.90 (0.05)***   | 0.41 (0.05)***    |
| Asian                    | Other Black           | 0.66 (0.01)***   | 0.85 (0.01)***   | 0.23 (0.01)***    |
|                          | Chinese               | -0.35 (0.02)***  | -0.19 (0.02)***  | -0.37 (0.02)***   |
|                          | Filipino              | -0.32 (0.02)***  | -0.10 (0.02)***  | 0.19 (0.02)***    |
|                          | Asian Indian          | -0.50 (0.03)***  | -0.075 (0.03)**  | 0.29 (0.03)***    |
|                          | Vietnamese            | -0.16 (0.02)***  | 0.21 (0.024)***  | -0.20 (0.03)***   |
| Hispanic                 | Korean                | -0.43 (0.031)*** | -0.17 (0.03)***  | -0.27 (0.03)***   |
|                          | Japanese              | 0.03 (0.03)      | -0.25 (0.03)***  | -0.09 (0.03)**    |
|                          | Other Asian           | -0.09 (0.02)***  | 0.36 (0.02)***   | 0.17 (0.02)***    |
|                          | Mexican               | 0.02 (0.01)**    | 0.46 (0.01)***   | 0.02 (0.01)*      |
|                          | Puerto Rican          | 0.50 (0.01)***   | 0.85 (0.02)***   | 0.12 (0.02)***    |
| Covariate (reference)    | Cuban                 | 0.42 (0.02)***   | 0.41 (0.02)***   | -0.05 (0.02)*     |
|                          | Central American      | -0.45 (0.02)***  | 0.07 (0.02)**    | -0.28 (0.03)***   |
|                          | South American        | -0.48 (0.02)***  | -0.14 (0.02)***  | -0.28 (0.03)***   |
|                          | Other Hispanic        | 0.32 (0.02)***   | 0.57 (0.02)***   | 0.13 (0.02)***    |
|                          | Age                   | .                | -0.08 (0.001)*** | -0.06 (0.001)***  |
| Age squared              | .                     | 0.001 (0.000)*** | 0.001 (0.000)*** |                   |
| Sex                      | .                     | 0.17 (0.003)***  | 0.03 (0.003)***  |                   |
| Marital status (Married) | Separated/Divorced    | .                | .                | 0.30 (0.01)***    |
|                          | Widowed               | .                | .                | 0.26 (0.01)***    |
|                          | NM/single             | .                | .                | 0.62 (0.01)***    |
|                          | No health insurance   | .                | .                | -0.97 (0.01)***   |
|                          | Poverty               | .                | .                | -0.004 (0.000)*** |
| Education (<HS)          | HS graduate           | .                | .                | -0.29 (0.004)***  |
|                          | Some college          | .                | .                | -0.37 (0.01)***   |
|                          | College degree +      | .                | .                | -0.62 (0.01)***   |
|                          | Poor English          | .                | .                | 0.46 (0.01)***    |
|                          | Not a citizen         | .                | .                | -0.41 (0.01)***   |
|                          | Foreign-born          | .                | .                | -0.20 (0.01)***   |
|                          | Live in South         | .                | .                | 0.06 (0.003)***   |
|                          | Year                  | .                | .                | -0.01 (0.001)***  |
|                          | Constant              | -3.12 (0.002)*** | -3.11 (0.033)*** | -1.59 (0.03)***   |
|                          | Pseudo R <sup>2</sup> | 0.01             | 0.12             | 0.18              |

Supplementary Table 3 *continued*.

Logistic regression coefficients and standard errors for independent living disability (ACS, n = 14,148,964).

| Group (reference)        | Variable            | Model 1         | Model 2          | Model 3         |
|--------------------------|---------------------|-----------------|------------------|-----------------|
| White (W European)       | E European          | 0.04 (0.01)***  | -0.01 (0.01)     | 0.03 (0.01)***  |
|                          | European, nec       | -0.31 (0.01)*** | -0.05 (0.01)***  | 0.15 (0.01)***  |
|                          | N American          | 0.30 (0.004)*** | 0.42 (0.004)***  | 0.19 (0.004)*** |
|                          | MENA                | 0.28 (0.01)***  | 0.51 (0.02)***   | 0.52 (0.02)***  |
|                          | Other White         | 0.51 (0.003)*** | 0.50 (0.004)***  | 0.20 (0.004)*** |
| Black                    | N American          | 0.50 (0.004)*** | 0.81 (0.004)***  | 0.20 (0.01)***  |
|                          | African             | -0.05 (0.02)**  | 0.45 (0.02)***   | 0.10 (0.02)***  |
|                          | West Indian         | -0.19 (0.02)*** | 0.08 (0.02)***   | -0.10 (0.02)*** |
|                          | C/S American        | -0.26 (0.07)*** | 0.003 (0.07)     | 0.04 (0.07)     |
|                          | European            | 0.57 (0.04)***  | 0.84 (0.04)***   | 0.32 (0.04)***  |
| Asian                    | Other Black         | 0.57 (0.01)***  | 0.78 (0.01)***   | 0.10 (0.01)***  |
|                          | Chinese             | -0.26 (0.01)*** | -0.11 (0.01)***  | -0.23 (0.02)*** |
|                          | Filipino            | -0.12 (0.01)*** | 0.10 (0.01)***   | 0.47 (0.02)***  |
|                          | Asian Indian        | -0.36 (0.02)*** | 0.07 (0.02)***   | 0.50 (0.02)***  |
|                          | Vietnamese          | -0.05 (0.02)**  | 0.33 (0.02)***   | -0.08 (0.02)*** |
| Hispanic                 | Korean              | -0.42 (0.02)*** | -0.19 (0.02)***  | -0.20 (0.03)*** |
|                          | Japanese            | 0.09 (0.02)***  | -0.22 (0.02)***  | -0.033 (0.02)   |
|                          | Other Asian         | 0.02 (0.02)     | 0.47 (0.02)***   | 0.31 (0.03)***  |
|                          | Mexican             | -0.09 (0.01)*** | 0.34 (0.01)***   | -0.15 (0.01)*** |
|                          | Puerto Rican        | 0.45 (0.01)***  | 0.82 (0.01)***   | 0.04 (0.01)**   |
| Covariate (reference)    | Cuban               | 0.33 (0.01)***  | 0.32 (0.02)***   | -0.12 (0.02)*** |
|                          | Central American    | -0.51 (0.02)*** | -0.01 (0.02)     | -0.42 (0.02)*** |
|                          | South American      | -0.53 (0.02)*** | -0.20 (0.02)***  | -0.32 (0.02)*** |
|                          | Other Hispanic      | 0.22 (0.01)***  | 0.47 (0.01)***   | 0.004 (0.02)**  |
|                          |                     |                 |                  | -0.104          |
| Marital status (Married) | Age                 | .               | -0.12 (0.001)*** | (0.001)***      |
|                          | Age squared         | .               | 0.001 (0.000)*** | (0.000)***      |
|                          | Sex                 | .               | 0.30 (0.003)***  | 0.17 (0.003)*** |
|                          | Separated/Divorced  | .               | .                | 0.37 (0.004)*** |
|                          | Widowed             | .               | .                | 0.35 (0.004)*** |
| Education (<HS)          | NM/single           | .               | .                | 0.82 (0.004)*** |
|                          | No health insurance | .               | .                | -0.94 (0.01)*** |
|                          | Poverty             | .               | .                | -0.003          |
|                          | HS graduate         | .               | .                | (0.000)***      |
|                          | Some college        | .               | .                | -0.42           |
| Year                     | College degree +    | .               | .                | (0.004)***      |
|                          | Poor English        | .               | .                | -0.57           |
|                          | Not a citizen       | .               | .                | (0.004)***      |
|                          | Foreign-born        | .               | .                | -0.90 (0.01)*** |
|                          | Live in South       | .               | .                | 0.49 (0.01)***  |
| Constant                 |                     | .               | .                | -0.36 (0.01)*** |
|                          |                     | .               | .                | -0.28 (0.01)*** |
|                          |                     | .               | .                | -0.28 (0.01)*** |
| Pseudo R <sup>2</sup>    |                     | .               | .                | -0.28 (0.01)*** |
|                          |                     | .               | .                | 0.07 (0.003)*** |
|                          |                     | .               | .                | -0.01           |
|                          |                     |                 | (0.001)***       |                 |
|                          |                     |                 | 0.09 (0.03)**    |                 |
|                          |                     |                 | 0.01             |                 |
|                          |                     |                 | 0.14             |                 |
|                          |                     |                 | 0.21             |                 |

Supplementary Table 3 *continued*.

Logistic regression coefficients and standard errors for hearing disability (ACS, n = 14,148,964).

| Group (reference)        | Variable              | Model 1          | Model 2          | Model 3           |
|--------------------------|-----------------------|------------------|------------------|-------------------|
| White (W European)       | E European            | -0.13 (0.01)***  | -0.19 (0.01)***  | -0.12 (0.01)***   |
|                          | European, nec         | -0.42 (0.01)***  | -0.18 (0.01)***  | -0.08 (0.01)***   |
|                          | N American            | 0.10 (0.004)***  | 0.20 (0.004)***  | 0.06 (0.004)***   |
|                          | MENA                  | -0.46 (0.02)***  | -0.34 (0.02)***  | -0.12 (0.02)***   |
|                          | Other White           | 0.14 (0.004)***  | 0.11 (0.004)***  | -0.04 (0.004)***  |
| Black                    | N American            | -0.53 (0.01)***  | -0.27 (0.01)***  | -0.55 (0.01)***   |
|                          | African               | -1.00 (0.03)***  | -0.51 (0.03)***  | -0.55 (0.03)***   |
|                          | West Indian           | -1.16 (0.03)***  | -0.88 (0.03)***  | -0.69 (0.03)***   |
|                          | C/S American          | -1.41 (0.12)***  | -1.13 (0.12)***  | -0.80 (0.12)***   |
|                          | European              | -0.27 (0.05)***  | -0.02 (0.05)     | -0.22 (0.05)***   |
| Asian                    | Other Black           | -0.33 (0.01)***  | -0.18 (0.01)***  | -0.47 (0.01)***   |
|                          | Chinese               | -0.77 (0.02)***  | -0.64 (0.02)***  | -0.41 (0.02)***   |
|                          | Filipino              | -0.61 (0.02)***  | -0.34 (0.02)***  | 0.09 (0.02)***    |
|                          | Asian Indian          | -1.08 (0.03)***  | -0.71 (0.03)***  | -0.24 (0.03)***   |
|                          | Vietnamese            | -0.67 (0.02)***  | -0.31 (0.03)***  | -0.24 (0.03)***   |
| Hispanic                 | Korean                | -1.02 (0.03)***  | -0.75 (0.03)***  | -0.47 (0.03)***   |
|                          | Japanese              | -0.12 (0.02)***  | -0.33 (0.02)***  | -0.14 (0.02)***   |
|                          | Other Asian           | -0.61 (0.02)***  | -0.16 (0.02)***  | -0.01 (0.02)      |
|                          | Mexican               | -0.41 (0.01)***  | 0.04 (0.02)***   | -0.08 (0.01)***   |
|                          | Puerto Rican          | -0.38 (0.02)***  | -0.05 (0.02)**   | -0.40 (0.02)***   |
| Covariate (reference)    | Cuban                 | -0.43 (0.02)***  | -0.50 (0.02)***  | -0.50 (0.02)***   |
|                          | Central American      | -1.09 (0.02)***  | -0.50 (0.03)***  | -0.43 (0.03)***   |
|                          | South American        | -0.95 (0.02)***  | -0.58 (0.02)***  | -0.37 (0.024)***  |
|                          | Other Hispanic        | -0.19 (0.02)***  | 0.07 (0.02)***   | 0.003 (0.02)      |
| Marital status (Married) | Age                   | .                | 0.02 (0.001)***  | 0.02 (0.001)***   |
|                          | Age squared           | .                | 0.000 (0.000)*** | 0.000 (0.000)***  |
| Education (<HS)          | Sex                   | .                | -0.68 (0.003)*** | -0.77 (0.003)***  |
|                          | Separated/Divorced    | .                | .                | 0.14 (0.004)***   |
| Covariate (reference)    | Widowed               | .                | .                | 0.15 (0.004)***   |
|                          | NM/single             | .                | .                | 0.06 (0.01)***    |
|                          | No health insurance   | .                | .                | -0.17 (0.01)***   |
|                          | Poverty               | .                | .                | -0.001 (0.000)*** |
|                          | HS graduate           | .                | .                | -0.26 (0.004)***  |
|                          | Some college          | .                | .                | -0.27 (0.004)***  |
|                          | College degree +      | .                | .                | -0.63 (0.01)***   |
|                          | Poor English          | .                | .                | 0.23 (0.01)***    |
|                          | Not a citizen         | .                | .                | -0.22 (0.01)***   |
|                          | Foreign-born          | .                | .                | -0.42 (0.01)***   |
| Marital status (Married) | Live in South         | .                | .                | 0.12 (0.003)***   |
|                          | Year                  | .                | .                | -0.002 (0.001)**  |
| Education (<HS)          | Constant              | -2.52 (0.002)*** | -4.59 (0.03)***  | -3.87 (0.04)***   |
|                          | Pseudo R <sup>2</sup> | 0.01             | 0.15             | 0.16              |



Supplementary Table 3 *continued*.

Logistic regression coefficients and standard errors for vision disability (ACS, n = 14,148,964).

| Group (reference)        | Variable              | Model 1          | Model 2          | Model 3           |
|--------------------------|-----------------------|------------------|------------------|-------------------|
| White (W European)       | E European            | -0.08 (0.01)***  | -0.12 (0.01)***  | -0.07 (0.01)***   |
|                          | European, nec         | -0.37 (0.02)***  | -0.18 (0.02)***  | -0.04 (0.02)      |
|                          | N American            | 0.31 (0.01)***   | 0.37 (0.01)***   | 0.14 (0.01)***    |
|                          | MENA                  | -0.05 (0.03)*    | 0.08 (0.03)**    | 0.08 (0.03)**     |
|                          | Other White           | 0.38 (0.01)***   | 0.34 (0.01)***   | 0.07 (0.01)***    |
| Black                    | N American            | 0.61 (0.01)***   | 0.82 (0.01)***   | 0.30 (0.01)***    |
|                          | African               | 0.20 (0.02)***   | 0.57 (0.02)***   | 0.26 (0.03)***    |
|                          | West Indian           | 0.13 (0.02)***   | 0.35 (0.02)***   | 0.19 (0.03)***    |
|                          | C/S American          | -0.06 (0.10)     | 0.16 (0.10)      | 0.22 (0.11)*      |
|                          | European              | 0.87 (0.04)***   | 1.05 (0.04)***   | 0.61 (0.05)***    |
| Asian                    | Other Black           | 0.68 (0.01)***   | 0.81 (0.01)***   | 0.24 (0.01)***    |
|                          | Chinese               | -0.45 (0.02)***  | -0.32 (0.02)***  | -0.37 (0.02)***   |
|                          | Filipino              | -0.31 (0.02)***  | -0.14 (0.02)***  | 0.17 (0.03)***    |
|                          | Asian Indian          | -0.58 (0.03)***  | -0.27 (0.03)***  | 0.05 (0.03)       |
|                          | Vietnamese            | -0.14 (0.03)***  | 0.13 (0.03)***   | -0.17 (0.03)***   |
| Hispanic                 | Korean                | -0.51 (0.04)***  | -0.31 (0.04)***  | -0.30 (0.04)***   |
|                          | Japanese              | -0.16 (0.03)***  | -0.35 (0.03)***  | -0.15 (0.03)***   |
|                          | Other Asian           | -0.02 (0.03)     | 0.30 (0.03)***   | 0.18 (0.03)***    |
|                          | Mexican               | 0.33 (0.01)***   | 0.66 (0.01)***   | 0.19 (0.01)***    |
|                          | Puerto Rican          | 0.61 (0.02)***   | 0.87 (0.02)***   | 0.28 (0.02)***    |
| Covariate (reference)    | Cuban                 | 0.34 (0.02)***   | 0.32 (0.02)***   | -0.09 (0.02)***   |
|                          | Central American      | -0.01 (0.02)     | 0.39 (0.02)***   | -0.004 (0.02)     |
|                          | South American        | -0.16 (0.02)***  | 0.11 (0.02)***   | -0.02 (0.03)      |
|                          | Other Hispanic        | 0.49 (0.02)***   | 0.68 (0.02)***   | 0.32 (0.02)***    |
|                          | Age                   | .                | -0.04 (0.001)*** | -0.02 (0.001)***  |
| Age squared              | .                     | 0.001 (0.000)*** | 0.000 (0.000)*** |                   |
| Sex                      | .                     | 0.02 (0.004)***  | -0.10 (0.004)*** |                   |
| Marital status (Married) | Separated/Divorced    | .                | .                | 0.35 (0.01)***    |
|                          | Widowed               | .                | .                | 0.31 (0.01)***    |
|                          | NM/single             | .                | .                | 0.38 (0.01)***    |
|                          | No health insurance   | .                | .                | -0.16 (0.01)***   |
|                          | Poverty               | .                | .                | -0.003 (0.000)*** |
| Education (<HS)          | HS graduate           | .                | .                | -0.39 (0.01)***   |
|                          | Some college          | .                | .                | -0.44 (0.01)***   |
|                          | College degree +      | .                | .                | -0.76 (0.01)***   |
|                          | Poor English          | .                | .                | 0.33 (0.01)***    |
|                          | Not a citizen         | .                | .                | -0.18 (0.01)***   |
| Other                    | Foreign-born          | .                | .                | -0.25 (0.01)***   |
|                          | Live in South         | .                | .                | 0.19 (0.004)***   |
|                          | Year                  | .                | .                | 0.001 (0.001)*    |
|                          | Constant              | -3.37 (0.003)*** | -3.77 (0.04)***  | -3.03 (0.04)***   |
|                          | Pseudo R <sup>2</sup> | 0.001            | 0.07             | 0.12              |

Supplementary Table 3 *continued*.

Logistic regression coefficients and standard errors for cognitive disability (ACS, n = 14,148,964).

| Group (reference)        | Variable            | Model 1          | Model 2          | Model 3           |
|--------------------------|---------------------|------------------|------------------|-------------------|
| White (W European)       | E European          | -0.07 (0.01)***  | -0.11 (0.01)***  | -0.05 (0.01)***   |
|                          | European, nec       | -0.22 (0.02)***  | -0.06 (0.02)***  | 0.15 (0.02)***    |
|                          | N American          | 0.39 (0.004)***  | 0.45 (0.004)***  | 0.20 (0.004)***   |
|                          | MENA                | 0.14 (0.02)***   | 0.24 (0.02)***   | 0.31 (0.02)***    |
|                          | Other White         | 0.61 (0.004)***  | 0.58 (0.004)***  | 0.26 (0.004)***   |
| Black                    | N American          | 0.59 (0.01)***   | 0.75 (0.01)***   | 0.05 (0.01)***    |
|                          | African             | 0.06 (0.02)**    | 0.32 (0.02)***   | -0.05 (0.02)*     |
|                          | West Indian         | -0.20 (0.02)***  | -0.04 (0.02)*    | -0.16 (0.02)***   |
|                          | C/S American        | -0.36 (0.09)***  | -0.20 (0.09)*    | -0.12 (0.09)      |
|                          | European            | 0.77 (0.04)***   | 0.91 (0.04)***   | 0.34 (0.04)***    |
| Asian                    | Other Black         | 0.69 (0.01)***   | 0.80 (0.01)***   | 0.03 (0.01)**     |
|                          | Chinese             | -0.45 (0.02)***  | -0.36 (0.02)***  | -0.37 (0.02)***   |
|                          | Filipino            | -0.34 (0.02)***  | -0.21 (0.02)***  | 0.24 (0.02)***    |
|                          | Asian Indian        | -0.61 (0.02)***  | -0.38 (0.02)***  | 0.20 (0.03)***    |
|                          | Vietnamese          | 0.11 (0.02)***   | 0.32 (0.02)***   | 0.02 (0.02)       |
| Hispanic                 | Korean              | -0.50 (0.03)***  | -0.35 (0.03)***  | -0.20 (0.03)***   |
|                          | Japanese            | 0.04 (0.02)      | -0.13 (0.02)***  | 0.13 (0.03)***    |
|                          | Other Asian         | 0.10 (0.02)***   | 0.34 (0.02)***   | 0.25 (0.02)***    |
|                          | Mexican             | -0.01 (0.01)*    | 0.21 (0.01)***   | -0.23 (0.01)***   |
|                          | Puerto Rican        | 0.70 (0.01)***   | 0.90 (0.01)***   | 0.07 (0.01)***    |
| Covariate (reference)    | Cuban               | 0.49 (0.02)***   | 0.48 (0.02)***   | 0.15 (0.02)***    |
|                          | Central American    | -0.44 (0.02)***  | -0.16 (0.02)***  | -0.483 (0.02)***  |
|                          | South American      | -0.42 (0.02)***  | -0.23 (0.02)***  | -0.22 (0.02)***   |
|                          | Other Hispanic      | 0.40 (0.01)***   | 0.54 (0.01)***   | 0.09 (0.02)***    |
| Marital status (Married) | Age                 | .                | -0.12 (0.001)*** | -0.09 (0.001)***  |
|                          | Age squared         | .                | 0.001 (0.000)*** | 0.001 (0.000)***  |
|                          | Sex                 | .                | 0.03 (0.003)***  | -0.10 (0.003)***  |
|                          | Separated/Divorced  | .                | .                | 0.51 (0.004)***   |
|                          | Widowed             | .                | .                | 0.36 (0.01)***    |
| Education (<HS)          | NM/single           | .                | .                | 0.91 (0.004)***   |
|                          | No health insurance | .                | .                | -0.73 (0.01)***   |
|                          | Poverty             | .                | .                | -0.004 (0.000)*** |
|                          | HS graduate         | .                | .                | -0.48 (0.004)***  |
|                          | Some college        | .                | .                | -0.62 (0.004)***  |
| Other                    | College degree +    | .                | .                | -0.99 (0.01)***   |
|                          | Poor English        | .                | .                | 0.44 (0.01)***    |
|                          | Not a citizen       | .                | .                | -0.56 (0.01)***   |
|                          | Foreign-born        | .                | .                | -0.34 (0.01)***   |
|                          | Live in South       | .                | .                | 0.06 (0.003)***   |
| Year                     | .                   | .                | -0.01 (0.001)*** |                   |
| Constant                 |                     | -2.82 (0.002)*** | -0.41 (0.03)***  | 0.73 (0.03)***    |
| Pseudo R <sup>2</sup>    |                     | 0.01             | 0.06             | 0.15              |

Note: W=Western. E=Eastern. N=North. C/S=Central and Southern. nec=not elsewhere classified. NM=never married. HS=high school. \*p<0.05; \*\*p<0.01; \*\*\*p<0.001.
